# Supplementary material
Source: PubMed Central journal article supplement (PMC6366448)
Supplement: NIHMS1009289-supplement-1.pdf [file NIHMS1009289-supplement-1.pdf]

**Supplementary Table 1. Daily stability of cortisol over the study period**

|                                           | <b>ICC*</b> | <b>Adjusted ICC**</b> |
|-------------------------------------------|-------------|-----------------------|
| <b>Daily Stability over 30+ days</b>      |             |                       |
| Awakening cortisol                        | 0.25        | 0.24                  |
| Bedtime cortisol                          | 0.15        | 0.15                  |
| <b>Weekly Stability over last 4 weeks</b> |             |                       |
| Awakening cortisol                        | 0.59        | 0.59                  |
| Bedtime cortisol                          | 0.53        | 0.53                  |

\*Shown are the Intraclass Correlation Coefficients (ICC) for cortisol over the study period.

\*\*Adjusted ICC has been adjusted for age and sex.

**Supplementary Table 2: Correlation between methylation vs. cortisol in all samples**

|       | <b>Bedtime Cortisol</b> | <b>Awakening Cortisol</b> |
|-------|-------------------------|---------------------------|
| CpG-1 | <b>-0.3357</b>          | -0.1378                   |
|       | <b>0.0039</b>           | 0.2384                    |
| CpG-2 | -0.0430                 | 0.1040                    |
|       | 0.7102                  | 0.3683                    |
| CpG-3 | -0.0123                 | <b>-0.3925</b>            |
|       | 0.9183                  | <b>0.0010</b>             |
| CpG-4 | 0.0770                  | -0.2003                   |
|       | 0.5173                  | 0.0893                    |
| CpG-5 | -0.2176                 | -0.0092                   |
|       | 0.0663                  | 0.9389                    |
| CpG-6 | -0.0187                 | -0.0803                   |
|       | 0.8716                  | 0.4875                    |
| CpG-7 | -0.0544                 | -0.1671                   |
|       | 0.6384                  | 0.1464                    |

**Supplementary Table 3. Correlation between *FKBP5* expression and psychosocial measures by sex**

|                         | <b>FEMALES (N=44)</b>            | <b>MALES (N=31)</b> |
|-------------------------|----------------------------------|---------------------|
| <b>BAI</b>              | <b>r=0.37</b><br><b>p=0.0133</b> | r=-0.05<br>p=0.8079 |
| <b>BDI-II</b>           | <b>r=0.32</b><br><b>p=0.0327</b> | r=0.03<br>p=0.8542  |
| <b>PSS</b>              | r=0.21<br>p=0.1676               | r=-0.05<br>p=0.7737 |
| <b>Emotional stress</b> | r=0.14<br>p=0.3750               | r=-0.16<br>p=0.3782 |

**Supplementary Table 4: Correlation between genotype vs. cortisol and emotional stress levels and *FKBP5* expression in FEMALES ONLY under a codominance model**

| <b>Genetic model:<br/>Codominant</b> |    | Additive<br>effect | Dominant effect | Both=0      |
|--------------------------------------|----|--------------------|-----------------|-------------|
| Trait and SNP                        | N  | F Prob>F           | F Prob>F        | F Prob>F    |
| <b>Bedtime Cortisol</b>              |    |                    |                 |             |
| rs1360780                            | 31 | 0.16 0.692         | 0.10 0.760      | 0.08 0.921  |
| rs9470080                            | 31 | 0.08 0.779         | 0.32 0.574      | 0.16 0.849  |
| rs9296158                            | 31 | 0.19 0.669         | 0.05 0.817      | 0.09 0.910  |
| rs4713902                            | 31 | 1.43 0.242         | 0.73 0.399      | 0.72 0.495  |
| <b>Waking Cortisol</b>               |    |                    |                 |             |
| rs1360780                            | 31 | 3.26 0.082         | 0.89 0.353      | 1.66 0.209  |
| rs9470080                            | 31 | 3.77 0.062         | 0.56 0.460      | 2.04 0.148  |
| rs9296158                            | 31 | 3.41 0.076         | 0.79 0.382      | 1.76 0.191  |
| rs4713902                            | 31 | 0.61 0.441         | 0.50 0.485      | 0.32 0.731  |
| <b>Emotional Stress</b>              |    |                    |                 |             |
| rs1360780                            | 31 | 1.94 0.174         | 0.00 0.957      | 1.67 0.206  |
| rs9470080                            | 31 | 1.46 0.238         | 0.16 0.697      | 0.82 0.449  |
| rs9296158                            | 31 | 1.99 0.170         | 0.00 0.979      | 1.65 0.210  |
| rs4713902                            | 31 | 0.12 0.734         | 0.23 0.638      | 0.11 0.893  |
| <b>FKBP5 Expression</b>              |    |                    |                 |             |
| rs1360780                            | 30 | 0.84 0.367         | 2.87 0.102      | 1.45 0.253  |
| rs9470080                            | 30 | 0.52 0.478         | 4.69 0.039*     | 2.63 0.091  |
| rs9296158                            | 30 | 0.72 0.403         | 3.38 0.077      | 1.75 0.193  |
| rs4713902                            | 30 | 6.81 <b>0.015*</b> | 4.38 0.046*     | 3.41 0.048* |

\*P<0.05.

**Supplementary Table 5: Genomic coordinates of the assayed CpGs from UCSC Genome Browser GRCh37/hg19 build.**

| <b>CpG Position</b> | <b>Genomic Coordinate on Chr.6</b> | <b>Location</b> |
|---------------------|------------------------------------|-----------------|
| CpG-1               | 35,607,855                         | Intron 2        |
| CpG-2               | 35,607,903                         | Intron 2        |
| CpG-3               | 35,558,488                         | Intron 7        |
| CpG-4               | 35,558,513                         | Intron 7        |
| CpG-5               | 35,558,566                         | Intron 7        |
| CpG-6               | 35,558,710                         | Intron 7        |
| CpG-7               | 35,558,721                         | Intron 7        |
